# Supplementary material for: Preparation and characterization of a novel drug-loaded Bi-layer scaffold for cartilage regeneration
Source: Royal Society of Chemistry journal article supplement (doi:10.1039/d2ra00311b), 2022-01-01
Supplement: d2ra00311b1.pdf [file d2ra00311b1.pdf]

## Supplementary documents

### 1. SA release

#### 1.1 SA Maximum absorption wavelength

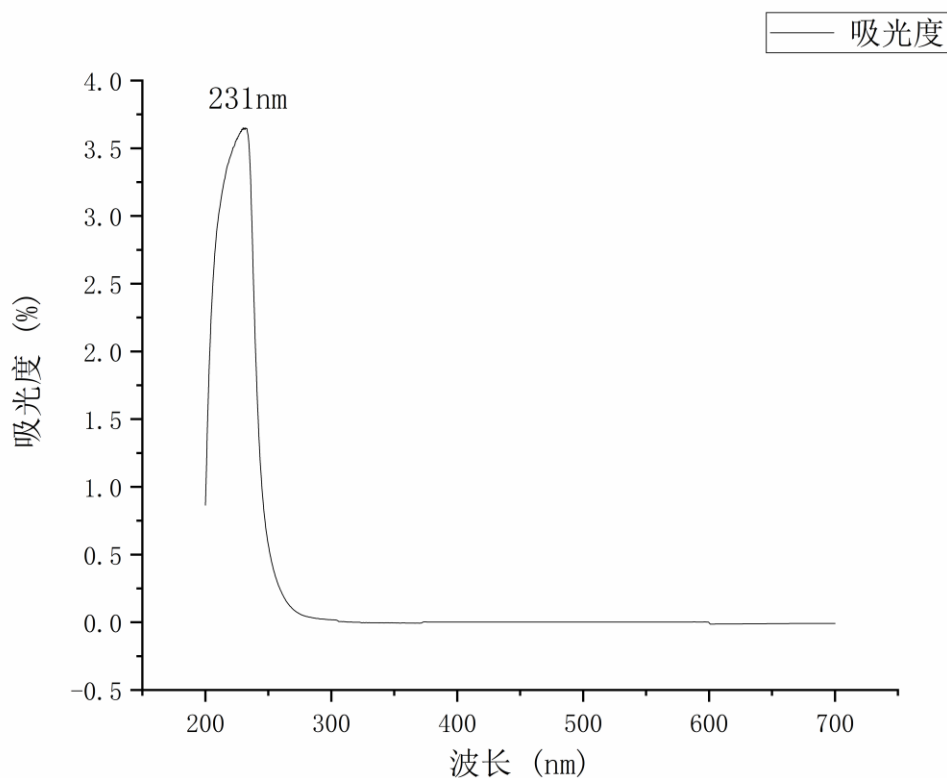

#### 1.2 SA Standard curve

| 样品 ID | 类型      | Ex | 浓度   | WL230.0 | 注释 |
|-------|---------|----|------|---------|----|
| 0     | Unknown |    | **** | 0.028   |    |
| 0     | Unknown |    | **** | 0.00    |    |
| 1.1   | Unknown |    | **** | 0.28    |    |
| 1.2   | Unknown |    | **** | 0.275   |    |
| 1.3   | Unknown |    | **** | 0.291   |    |
| 2.1   | Unknown |    | **** | 0.589   |    |
| 2.2   | Unknown |    | **** | 0.576   |    |
| 2.3   | Unknown |    | **** | 0.59    |    |
| 3.1   | Unknown |    | **** | 1.195   |    |
| 3.2   | Unknown |    | **** | 1.206   |    |

|     |         |  |      |       |  |
|-----|---------|--|------|-------|--|
| 3.3 | Unknown |  | **** | 1.182 |  |
| 4.1 | Unknown |  | **** | 2.406 |  |
| 4.2 | Unknown |  | **** | 2.421 |  |
| 4.3 | Unknown |  | **** | 2.427 |  |
| 5.1 | Unknown |  | **** | 3.600 |  |
| 5.2 | Unknown |  | **** | 3.594 |  |
| 5.3 | Unknown |  | **** | 3.598 |  |

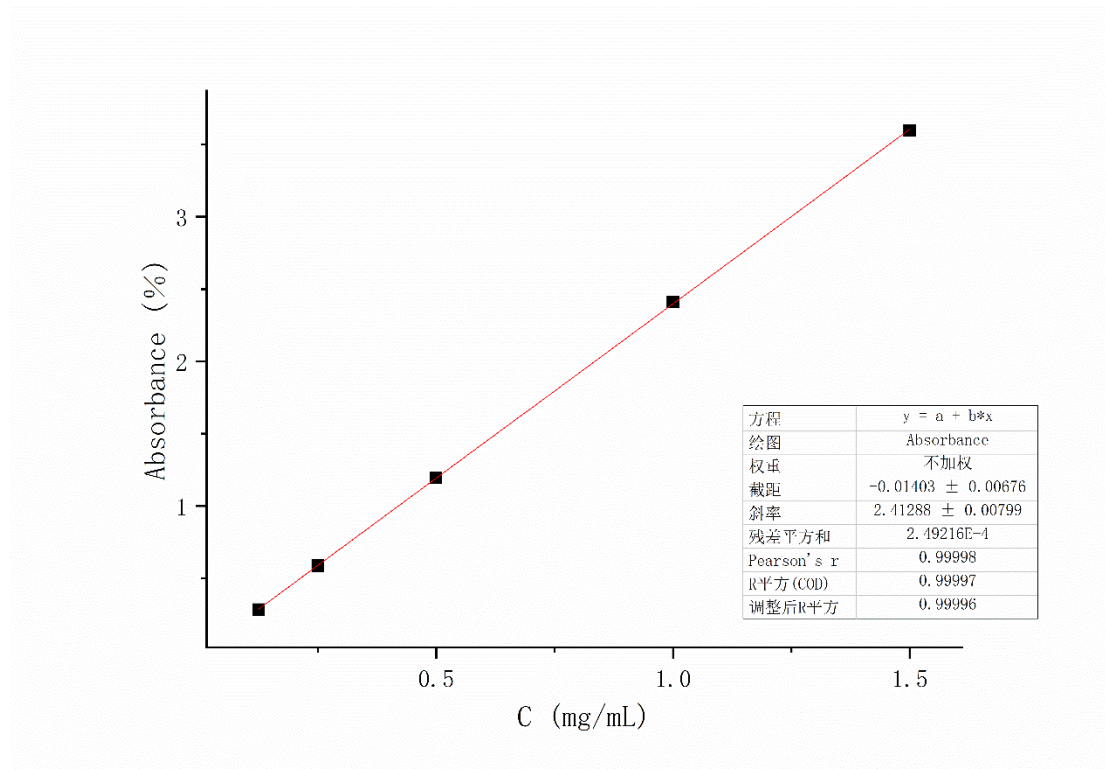

### 1.3 SA Concentration determination

SAtest1

| 样品 ID | 类型      | Ex | 浓度   | WL230.0 | 注释 |
|-------|---------|----|------|---------|----|
| 0     | Unknown |    | **** | 0.021   |    |
| 0     | Unknown |    | **** | 0.000   |    |
| 1,1   | Unknown |    | **** | 7.712   |    |
| 1,2   | Unknown |    | **** | 7.900   |    |
| 1,3   | Unknown |    | **** | 7.955   |    |
| 1,4   | Unknown |    | **** | 8.249   |    |
| 1,5   | Unknown |    | **** | 8.330   |    |
| 2,1   | Unknown |    | **** | 6.934   |    |
| 2,2   | Unknown |    | **** | 6.893   |    |
| 2,3   | Unknown |    | **** | 6.922   |    |
| 2,4   | Unknown |    | **** | 7.296   |    |

|     |         |  |      |       |  |
|-----|---------|--|------|-------|--|
| 2,5 | Unknown |  | **** | 7.566 |  |
| 3,1 | Unknown |  | **** | 5.729 |  |
| 3,2 | Unknown |  | **** | 5.935 |  |
| 3,3 | Unknown |  | **** | 6.166 |  |
| 3,4 | Unknown |  | **** | 6.035 |  |
| 3,5 | Unknown |  | **** | 6.312 |  |
| 4,1 | Unknown |  | **** | 4.357 |  |
| 4,2 | Unknown |  | **** | 4.489 |  |
| 4,3 | Unknown |  | **** | 4.395 |  |
| 4,4 | Unknown |  | **** | 4.310 |  |
| 4,5 | Unknown |  | **** | 4.980 |  |
| 5,1 | Unknown |  | **** | 4.108 |  |
| 5,2 | Unknown |  | **** | 3.957 |  |
| 5,3 | Unknown |  | **** | 4.041 |  |
| 5,4 | Unknown |  | **** | 3.964 |  |
| 5,5 | Unknown |  | **** | 3.777 |  |
| 6,1 | Unknown |  | **** | 3.181 |  |
| 6,2 | Unknown |  | **** | 3.497 |  |
| 6,3 | Unknown |  | **** | 3.480 |  |
| 6,4 | Unknown |  | **** | 3.372 |  |
| 6,5 | Unknown |  | **** | 3.023 |  |
| 7,1 | Unknown |  | **** | 2.573 |  |
| 7,2 | Unknown |  | **** | 2.693 |  |
| 7,3 | Unknown |  | **** | 2.654 |  |
| 7,4 | Unknown |  | **** | 2.863 |  |
| 7,5 | Unknown |  | **** | 2.756 |  |

| 样品 ID | 类型      | Ex | 浓度   | WL230.0 | 注释 |
|-------|---------|----|------|---------|----|
| 0     | Unknown |    | **** | 0.030   |    |
| 0     | Unknown |    | **** | 0.000   |    |
| 1, 1  | Unknown |    | **** | 2.219   |    |
| 1, 2  | Unknown |    | **** | 2.347   |    |
| 1, 3  | Unknown |    | **** | 2.407   |    |
| 1, 4  | Unknown |    | **** | 2.629   |    |
| 1, 5  | Unknown |    | **** | 2.445   |    |
| 2, 1  | Unknown |    | **** | 1.811   |    |
| 2, 2  | Unknown |    | **** | 1.579   |    |
| 2, 3  | Unknown |    | **** | 2.163   |    |
| 2, 4  | Unknown |    | **** | 2.150   |    |
| 2, 5  | Unknown |    | **** | 2.018   |    |

|      |         |  |      |       |  |
|------|---------|--|------|-------|--|
| 3, 1 | Unknown |  | **** | 1.261 |  |
| 3, 2 | Unknown |  | **** | 1.558 |  |
| 3, 3 | Unknown |  | **** | 1.279 |  |
| 3, 4 | Unknown |  | **** | 1.470 |  |
| 3, 5 | Unknown |  | **** | 1.741 |  |
| 4, 1 | Unknown |  | **** | 0.830 |  |
| 4, 2 | Unknown |  | **** | 0.975 |  |
| 4, 3 | Unknown |  | **** | 1.117 |  |
| 4, 4 | Unknown |  | **** | 0.881 |  |
| 4, 5 | Unknown |  | **** | 1.219 |  |
| 5, 1 | Unknown |  | **** | 0.762 |  |
| 5, 2 | Unknown |  | **** | 0.435 |  |
| 5, 3 | Unknown |  | **** | 0.428 |  |
| 5, 4 | Unknown |  | **** | 0.606 |  |
| 5, 5 | Unknown |  | **** | 0.862 |  |
| 6, 1 | Unknown |  | **** | 0.127 |  |
| 6, 2 | Unknown |  | **** | 0.542 |  |
| 6, 3 | Unknown |  | **** | 0.292 |  |
| 6, 4 | Unknown |  | **** | 0.668 |  |
| 6, 5 | Unknown |  | **** | 0.309 |  |
| 7, 1 | Unknown |  | **** | 0.463 |  |
| 7, 2 | Unknown |  | **** | 0.171 |  |
| 7, 3 | Unknown |  | **** | 0.350 |  |
| 7, 4 | Unknown |  | **** | 0.003 |  |
| 7, 5 | Unknown |  | **** | 0.706 |  |

表 test

| 样品 ID | 类型      | Ex | 浓度   | WL230.0 | 注释 |
|-------|---------|----|------|---------|----|
| 0     | Unknown |    | **** | 0.033   |    |
| 0     | Unknown |    | **** | 0.000   |    |
| 1, 1  | Unknown |    | **** | 0.326   |    |
| 1, 2  | Unknown |    | **** | 0.078   |    |
| 1, 3  | Unknown |    | **** | 0.171   |    |
| 1, 4  | Unknown |    | **** | 0.540   |    |
| 1, 5  | Unknown |    | **** | 0.253   |    |
| 2, 1  | Unknown |    | **** | 0.139   |    |
| 2, 2  | Unknown |    | **** | 0.045   |    |
| 2, 3  | Unknown |    | **** | 0.410   |    |
| 2, 4  | Unknown |    | **** | 0.359   |    |
| 2, 5  | Unknown |    | **** | 0.043   |    |
| 3, 1  | Unknown |    | **** | 0.215   |    |

|      |         |  |      |       |  |
|------|---------|--|------|-------|--|
| 3, 2 | Unknown |  | **** | 0.477 |  |
| 3, 3 | Unknown |  | **** | 0.163 |  |
| 3, 4 | Unknown |  | **** | 0.130 |  |
| 3, 5 | Unknown |  | **** | 0.030 |  |

## 2. KGN test

### 2.1 KGN Standard curve

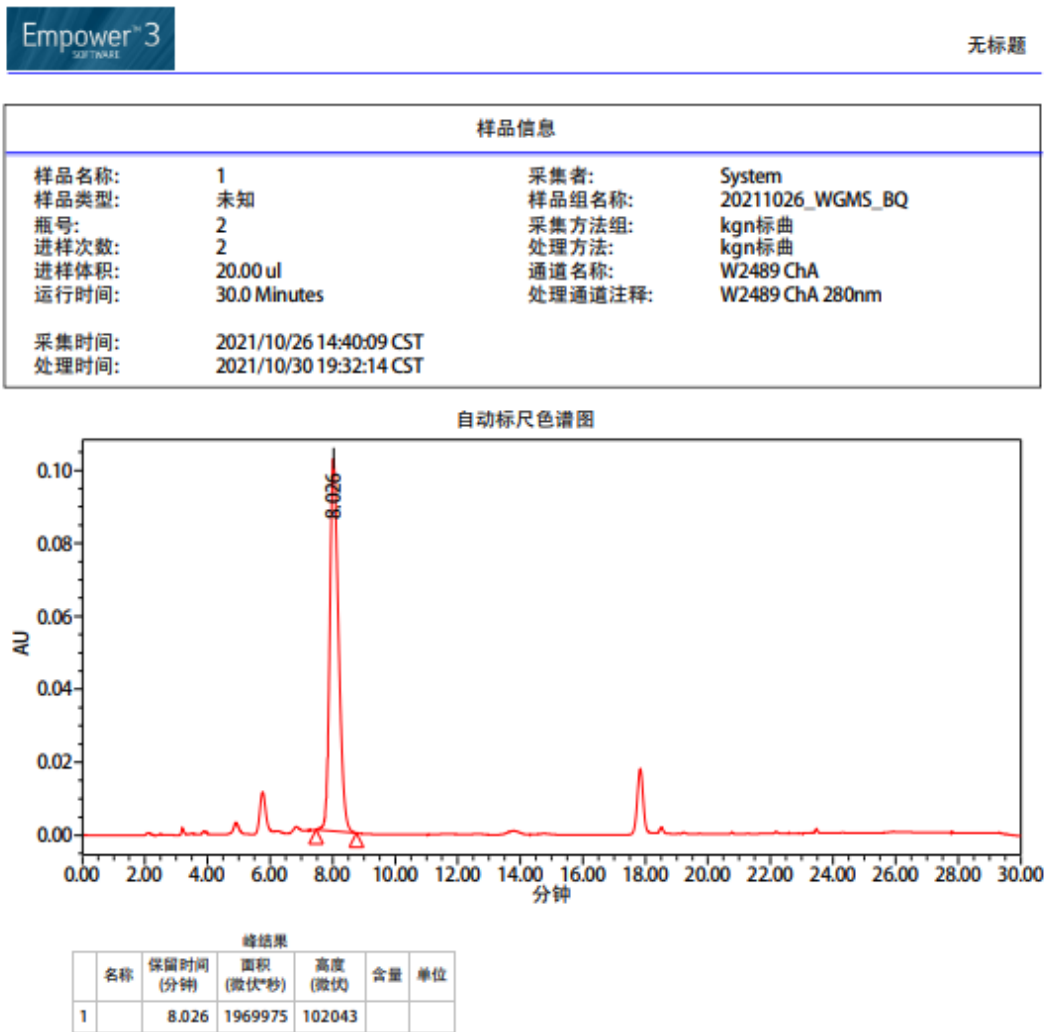

## 样品信息

|       |                         |         |                  |
|-------|-------------------------|---------|------------------|
| 样品名称: | 2                       | 采集者:    | System           |
| 样品类型: | 未知                      | 样品组名称:  | 20211026_WGMS_BQ |
| 瓶号:   | 3                       | 采集方法组:  | kgm标曲            |
| 进样次数: | 2                       | 处理方法:   | kgm标曲            |
| 进样体积: | 20.00 ul                | 通道名称:   | W2489 ChA        |
| 运行时间: | 30.0 Minutes            | 处理通道注释: | W2489 ChA 280nm  |
| 采集时间: | 2021/10/26 15:41:49 CST |         |                  |
| 处理时间: | 2021/10/30 19:36:45 CST |         |                  |

## 自动标尺色谱图

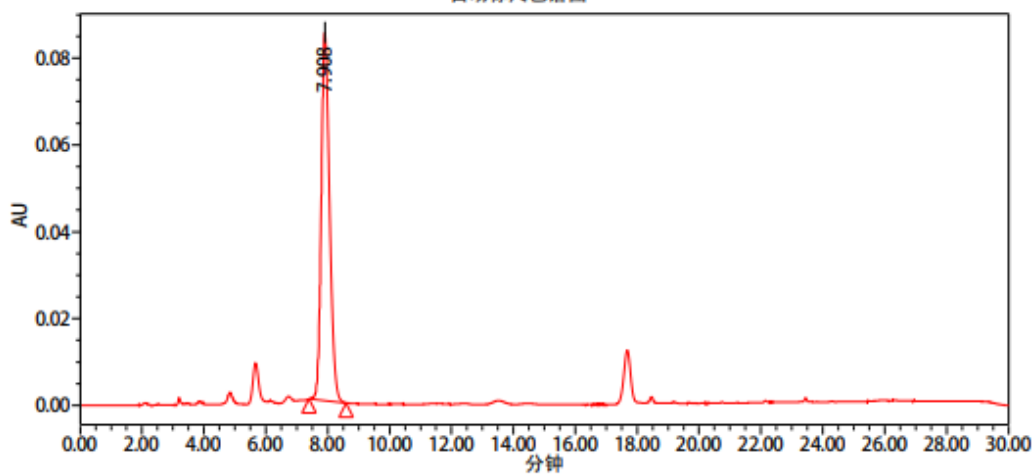

## 峰结果

| 名称 | 保留时间<br>(分钟) | 面积<br>(微伏*秒) | 高度<br>(微伏) | 含量 | 单位 |
|----|--------------|--------------|------------|----|----|
| 1  | 7.908        | 1579281      | 84764      |    |    |

## 样品信息

|       |                         |         |                  |
|-------|-------------------------|---------|------------------|
| 样品名称: | 3                       | 采集者:    | System           |
| 样品类型: | 未知                      | 样品组名称:  | 20211026_WGMS_BQ |
| 瓶号:   | 4                       | 采集方法组:  | kgn标曲            |
| 进样次数: | 2                       | 处理方法:   | kgn标曲            |
| 进样体积: | 20.00 ul                | 通道名称:   | W2489 ChA        |
| 运行时间: | 30.0 Minutes            | 处理通道注释: | W2489 ChA 280nm  |
| 采集时间: | 2021/10/26 16:43:25 CST |         |                  |
| 处理时间: | 2021/10/30 19:41:04 CST |         |                  |

## 自动标尺色谱图

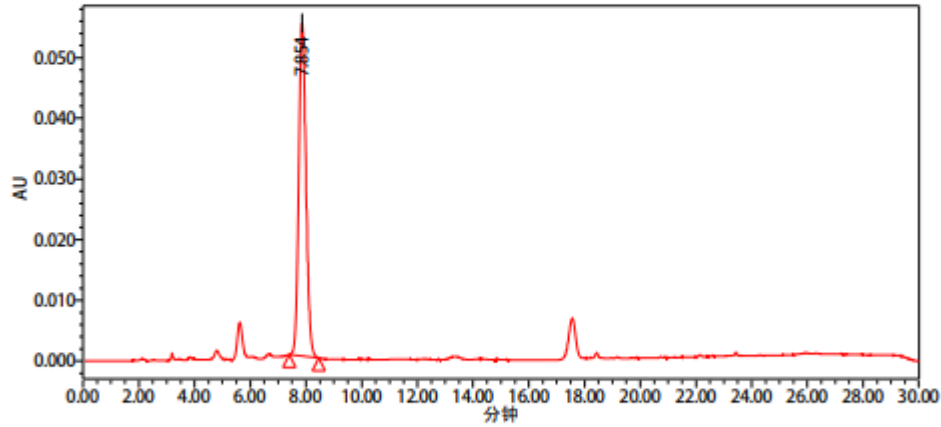

## 峰结果

| 名称 | 保留时间<br>(分钟) | 面积<br>(微伏*秒) | 高度<br>(微伏) | 含量 | 单位 |
|----|--------------|--------------|------------|----|----|
| 1  | 7.854        | 989106       | 54915      |    |    |

## 样品信息

|       |                         |         |                  |
|-------|-------------------------|---------|------------------|
| 样品名称: | 4                       | 采集者:    | System           |
| 样品类型: | 未知                      | 样品组名称:  | 20211026_WGMS_BQ |
| 瓶号:   | 5                       | 采集方法组:  | kgn标曲            |
| 进样次数: | 2                       | 处理方法:   | kgn标曲            |
| 进样体积: | 20.00 ul                | 通道名称:   | W2489 ChA        |
| 运行时间: | 30.0 Minutes            | 处理通道注释: | W2489 ChA 280nm  |
| 采集时间: | 2021/10/26 17:45:02 CST |         |                  |
| 处理时间: | 2021/10/30 19:47:17 CST |         |                  |

## 自动标尺色谱图

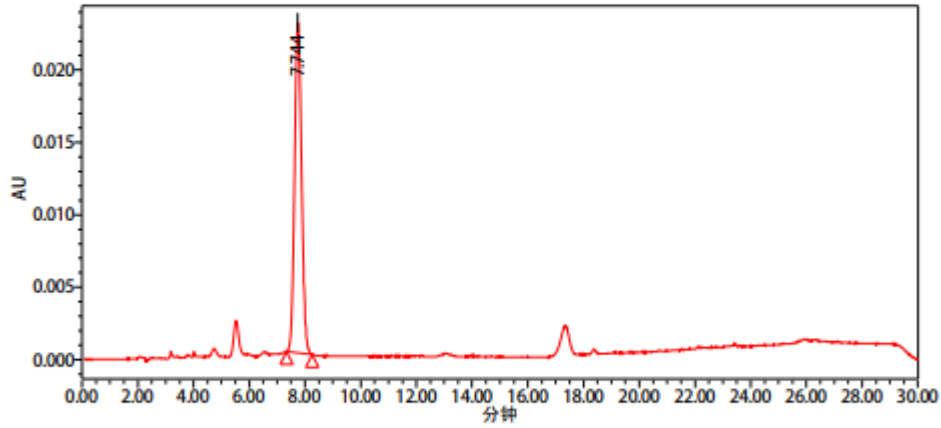

## 峰结果

| 名称 | 保留时间<br>(分钟) | 面积<br>(微伏*秒) | 高度<br>(微伏) | 含量 | 单位 |
|----|--------------|--------------|------------|----|----|
| 1  | 7.744        | 392613       | 22802      |    |    |



样品信息

|       |                         |         |                  |
|-------|-------------------------|---------|------------------|
| 样品名称: | 5                       | 采集者:    | System           |
| 样品类型: | 未知                      | 样品组名称:  | 20211026_WGMS_BQ |
| 瓶号:   | 6                       | 采集方法组:  | kgn标曲            |
| 进样次数: | 2                       | 处理方法:   | kgn标曲            |
| 进样体积: | 20.00 ul                | 通道名称:   | W2489 ChA        |
| 运行时间: | 30.0 Minutes            | 处理通道注释: | W2489 ChA 280nm  |
| 采集时间: | 2021/10/26 18:46:35 CST |         |                  |
| 处理时间: | 2021/10/30 19:50:19 CST |         |                  |

自动标尺色谱图

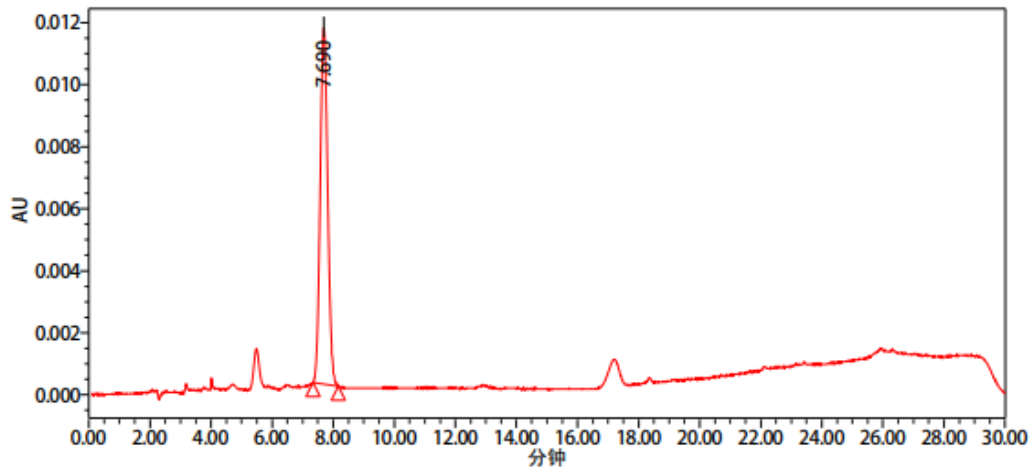

峰结果

| 名称 | 保留时间 (分钟) | 面积 (微伏*秒) | 高度 (微伏) | 含量 | 单位 |
|----|-----------|-----------|---------|----|----|
| 1  | 7.690     | 192817    | 11507   |    |    |

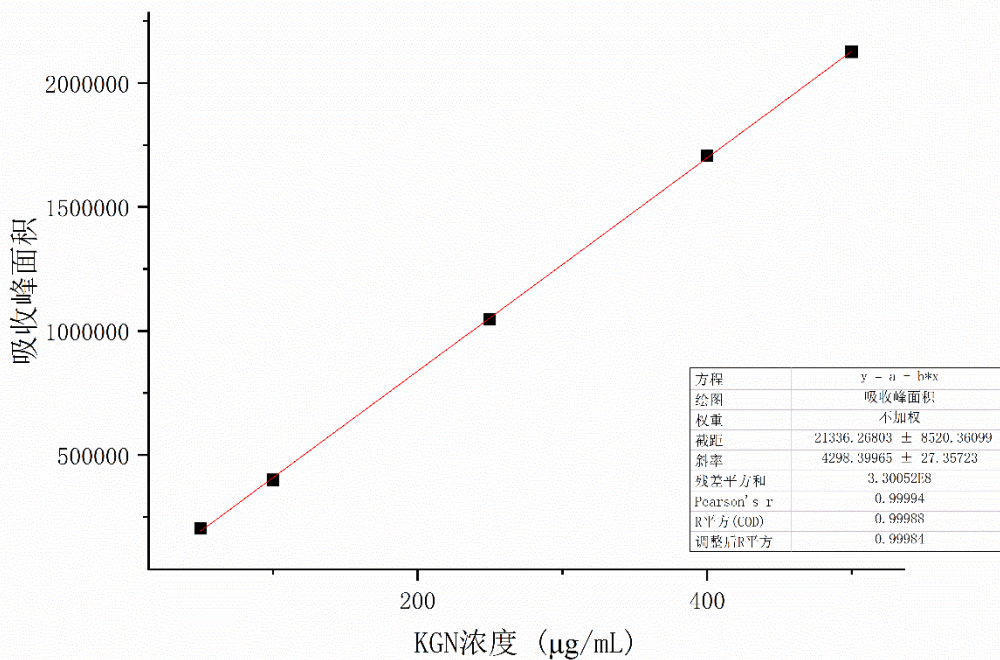

## 2.2 kgn data

表 day 1

|   | 名称 | 保留时间 (分钟) | 面积 (微伏*秒) | 高度 (微伏) | 含量 | 单位 |
|---|----|-----------|-----------|---------|----|----|
| 1 |    | 7.694     | 188753    | 11103   |    |    |
| 2 |    | 7.703     | 231531    | 13619   |    |    |
| 3 |    | 7.706     | 267262    | 15721   |    |    |
| 4 |    | 7.707     | 289052    | 17003   |    |    |
| 5 |    | 7.713     | 206122    | 12125   |    |    |

表 day1

|   | 名称 | 保留时间 (分钟) | 面积 (微伏*秒) | 高度 (微伏) | 含量 | 单位 |
|---|----|-----------|-----------|---------|----|----|
| 1 |    | 7.789     | 210657    | 12392   |    |    |
| 2 |    | 7.791     | 324753    | 19103   |    |    |
| 3 |    | 7.795     | 962403    | 50653   |    |    |
| 4 |    | 7.8       | 924713    | 48669   |    |    |
| 5 |    | 7.804     | 658220    | 38719   |    |    |

表 day-2

|   | 名称 | 保留时间 (分钟) | 面积 (微伏*秒) | 高度 (微伏) | 含量 | 单位 |
|---|----|-----------|-----------|---------|----|----|
| 1 |    | 7.835     | 2386994   | 119350  |    |    |
| 2 |    | 7.844     | 1298768   | 68356   |    |    |
| 3 |    | 7.848     | 1499832   | 78939   |    |    |
| 4 |    | 7.776     | 909788    | 47884   |    |    |
| 5 |    | 7.848     | 1402583   | 73820   |    |    |

表 day-3

|   | 名称 | 保留时间 (分钟) | 面积 (微伏*秒) | 高度 (微伏) | 含量 | 单位 |
|---|----|-----------|-----------|---------|----|----|
| 1 |    | 7.865     | 4440396   | 222020  |    |    |
| 2 |    | 7.875     | 5120927   | 256046  |    |    |
| 3 |    | 7.889     | 5469361   | 273468  |    |    |
| 4 |    | 7.899     | 4630995   | 231550  |    |    |
| 5 |    | 7.905     | 4677964   | 233898  |    |    |

表 day-6

|   | 名称 | 保留时间 (分钟) | 面积 (微伏*秒) | 高度 (微伏) | 含量 | 单位 |
|---|----|-----------|-----------|---------|----|----|
| 1 |    | 7.949     | 6306224   | 274184  |    |    |
| 2 |    | 7.954     | 7596148   | 330267  |    |    |
| 3 |    | 7.957     | 8746707   | 380292  |    |    |
| 4 |    | 7.927     | 6823099   | 296656  |    |    |
| 5 |    | 7.949     | 7814451   | 339759  |    |    |

表 day 8

|   | 名称 | 保留时间 (分钟) | 面积 (微伏*秒) | 高度 (微伏) | 含量 | 单位 |
|---|----|-----------|-----------|---------|----|----|
| 1 |    | 8.065     | 10748542  | 467328  |    |    |
| 2 |    | 8.102     | 11383085  | 494917  |    |    |
| 3 |    | 8.13      | 10754473  | 467586  |    |    |
| 4 |    | 8.017     | 10008733  | 435162  |    |    |
| 5 |    | 7.905     | 9756653   | 424202  |    |    |

表 day 10

|   | 名称 | 保留时间 (分钟) | 面积 (微伏*秒) | 高度 (微伏) | 含量 | 单位 |
|---|----|-----------|-----------|---------|----|----|
| 1 |    | 8.139     | 13080842  | 568732  |    |    |
| 2 |    | 8.165     | 10043452  | 436672  |    |    |
| 3 |    | 8.021     | 10578531  | 459936  |    |    |
| 4 |    | 8.065     | 11599233  | 504314  |    |    |
| 5 |    | 8.102     | 11575465  | 503281  |    |    |

表 day 13

|   | 名称 | 保留时间 (分钟) | 面积 (微伏*秒) | 高度 (微伏) | 含量 | 单位 |
|---|----|-----------|-----------|---------|----|----|
| 1 |    | 8.021     | 10002172  | 434877  |    |    |
| 2 |    | 7.954     | 8981688   | 390508  |    |    |
| 3 |    | 7.957     | 10267106  | 446396  |    |    |
| 4 |    | 7.969     | 11434075  | 497134  |    |    |
| 5 |    | 8.17      | 10127309  | 440318  |    |    |

表 day 16

|  | 名称 | 保留时间 (分钟) | 面积 (微伏*秒) | 高度 (微伏) | 含量 | 单位 |
|--|----|-----------|-----------|---------|----|----|
|  |    |           |           |         |    |    |

|   |  |       |         |        |  |  |
|---|--|-------|---------|--------|--|--|
| 1 |  | 7.859 | 7692936 | 334475 |  |  |
| 2 |  | 7.863 | 7178704 | 312118 |  |  |
| 3 |  | 7.905 | 8568733 | 372554 |  |  |
| 4 |  | 7.927 | 9199951 | 399998 |  |  |
| 5 |  | 7.949 | 7538309 | 327753 |  |  |

表 day 19

|   | 名称 | 保留时间 (分钟) | 面积 (微伏*秒) | 高度 (微伏) | 含量 | 单位 |
|---|----|-----------|-----------|---------|----|----|
| 1 |    | 7.732     | 5369558   | 244071  |    |    |
| 2 |    | 7.713     | 5270324   | 239560  |    |    |
| 3 |    | 7.721     | 6279767   | 285444  |    |    |
| 4 |    | 7.699     | 6704214   | 304737  |    |    |
| 5 |    | 7.703     | 6170492   | 280477  |    |    |
